# Supplementary material for: Palladium nanoparticles supported on a carbazole functionalized mesoporous organic polymer: synthesis and their application as efficient catalysts for the Suzuki–Miyaura cross coupling reaction
Source: Royal Society of Chemistry journal article supplement (doi:10.1039/c6py01784c), 2017-01-01

## Supporting Information

### **Palladium nanoparticles supported on carbazole functionalized mesoporous organic polymer: synthesis and their application as efficient catalysts for Suzuki–Miyaura cross coupling reaction**

Hui Zhou,<sup>a</sup> Chuanguang Wu,<sup>a</sup> Qiaolin Wu,<sup>\*a</sup> Bixuan Guo,<sup>a</sup> Wanting Liu,<sup>a</sup> Guanghua Li,<sup>b</sup> Qing Su<sup>\*a,c</sup> and Ying Mu<sup>a</sup>

<sup>a</sup>College of Chemistry, Jilin University, 2699 Qianjin Street, Changchun 130012, P. R. China

<sup>b</sup>State Key Laboratory of Inorganic Synthesis and Preparative Chemistry, Jilin University, 2699 Qianjin Street, Changchun 130012, P. R. China

<sup>c</sup>State Key Laboratory of Fine Chemicals, Dalian University of Technology, Dalian 116024, China

Emails: [wuql@jlu.edu.cn](mailto:wuql@jlu.edu.cn) (Q. Wu); [suqing@jlu.edu.cn](mailto:suqing@jlu.edu.cn) (Q. Su)

#### **Table of Contents**

|                                                                                                  |          |
|--------------------------------------------------------------------------------------------------|----------|
| <b>Fig. S1</b> <sup>13</sup> C CP-MAS NMR of CzMOP and Pd@CzMOP.....                             | <b>2</b> |
| <b>Fig. S2</b> Pore size distribution of Pd@CzMOP.....                                           | <b>3</b> |
| <b>Fig. S3</b> Reusability of Pd@CzMOP for Suzuki coupling reaction.....                         | <b>3</b> |
| <b>Fig. S4</b> Effect of reaction time on Suzuki coupling reaction using Pd@CzMOP .....          | <b>4</b> |
| <b>Fig. S5</b> PdNPs size distribution and HR-TEM images of Pd@CzMOP after five cycles.....      | <b>4</b> |
| <b>Fig. S6</b> SEM image of Pd@CzMOP after five cycles.....                                      | <b>5</b> |
| <b>Fig. S7</b> XPS spectra of Pd@CzMOP (metallic Pd) after five cycles.....                      | <b>5</b> |
| <b>Fig. S8</b> XRD patterns of Pd@CzMOP after five cycles.....                                   | <b>6</b> |
| <b>Table S1</b> Effect of the reaction condition on Suzuki coupling reaction using Pd@CzMOP..... | <b>7</b> |
| <b>Table S2</b> Hot filtration test on Suzuki coupling reaction using Pd@CzMOP.....              | <b>7</b> |
| <b>Spectral Data</b> .....                                                                       | <b>8</b> |

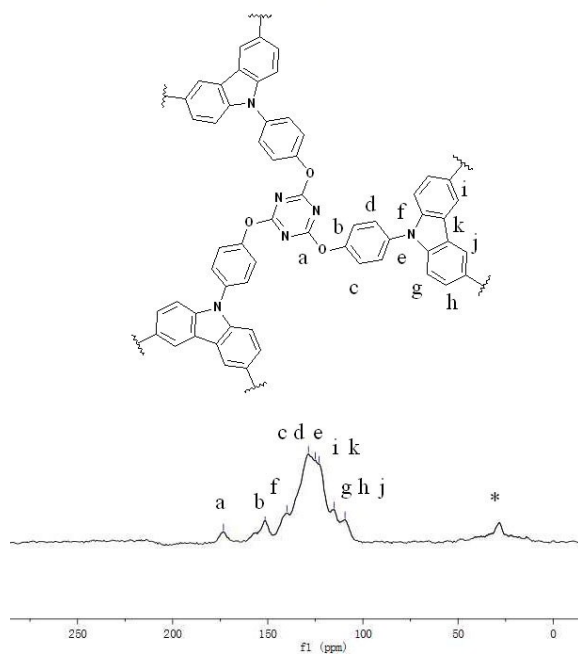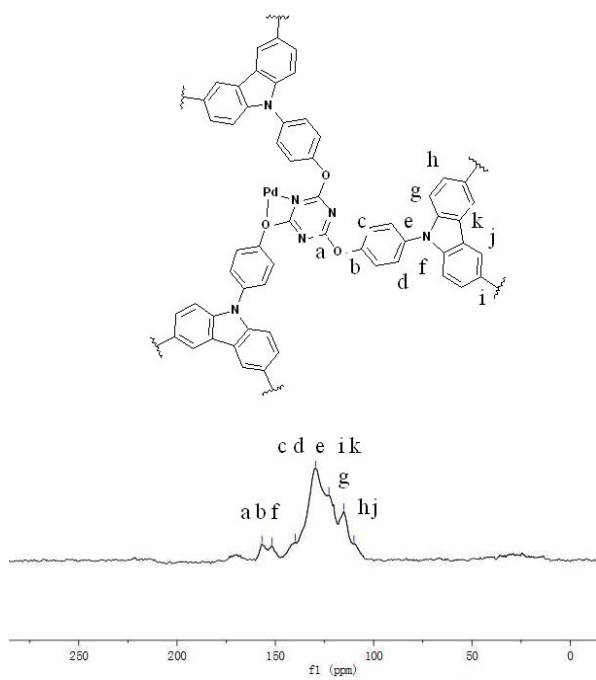

**Fig. S1**  $^{13}\text{C}$  CP-MAS NMR of CzMOP (top) and Pd@CzMOP (bottom).

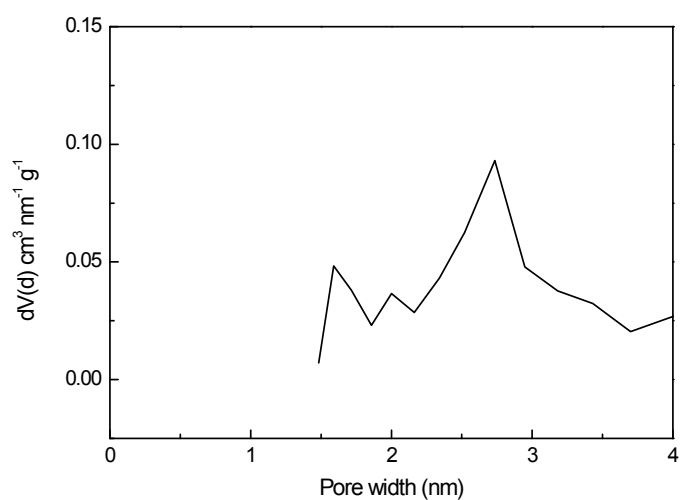

**Fig. S2** Pore size distribution of Pd@CzMOP.

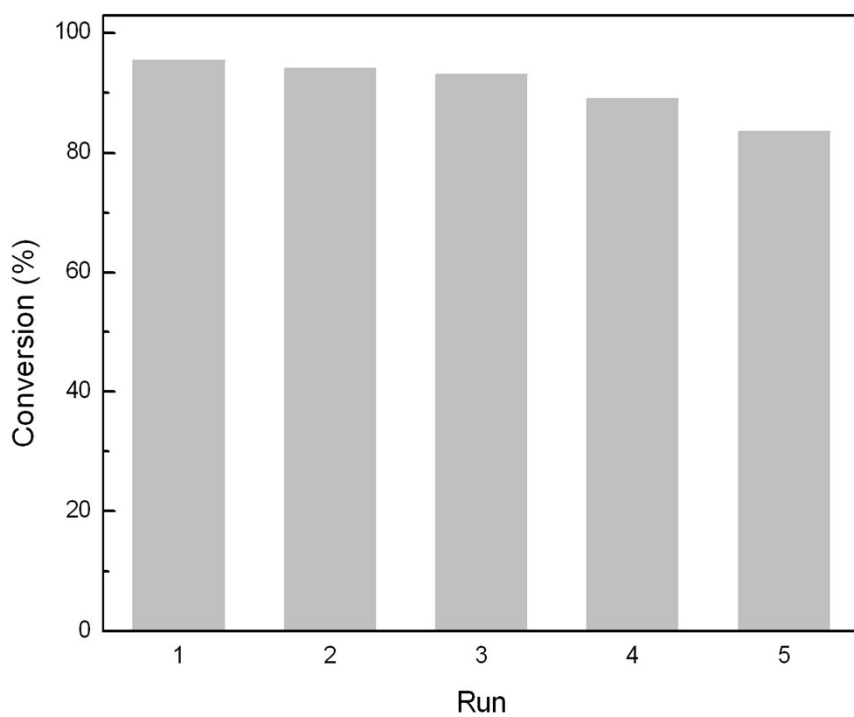

**Fig. S3** Reusability of Pd@CzMOP for Suzuki coupling reaction.

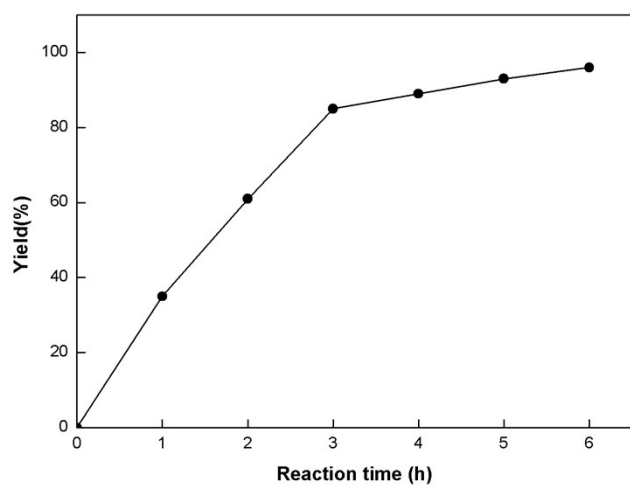

**Fig. S4** Effect of reaction time on the percentage conversion in the Pd@CzMOP catalyzed reaction.

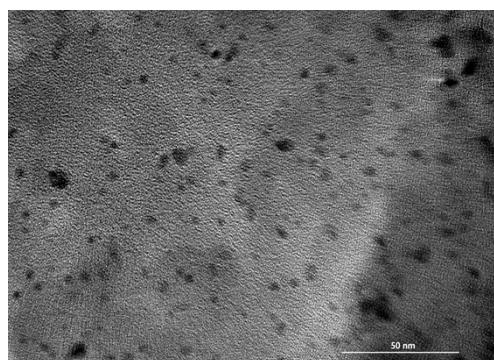

a

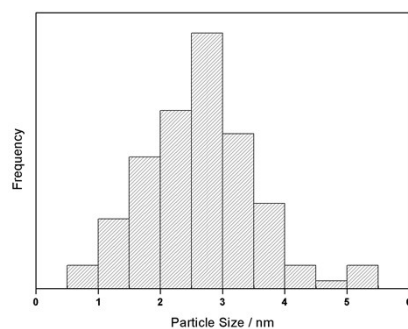

b

**Fig. S5** HR-TEM images of Pd@CzMOP after five cycles (a). Pd NPs size distribution of Pd@CzMOP after five cycles (b).

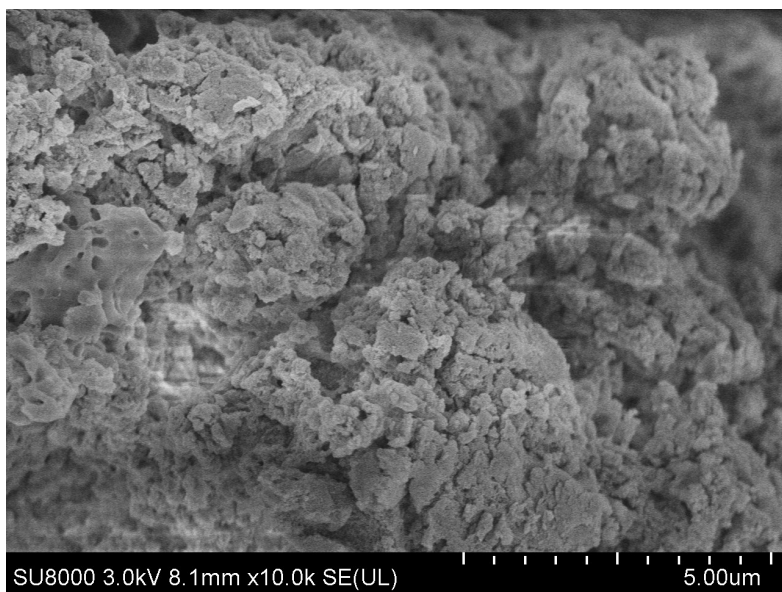

**Fig. S6** SEM image of Pd@CzMOP for Suzuki coupling reaction after five cycles.

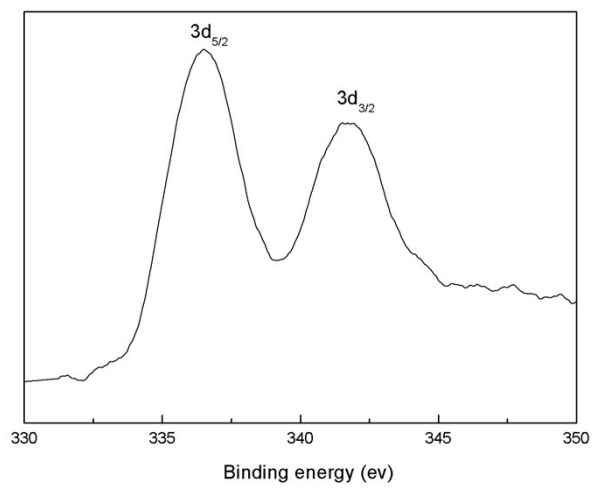

**Fig. S7** XPS spectra of Pd@CzMOP (metallic Pd) after five cycles.

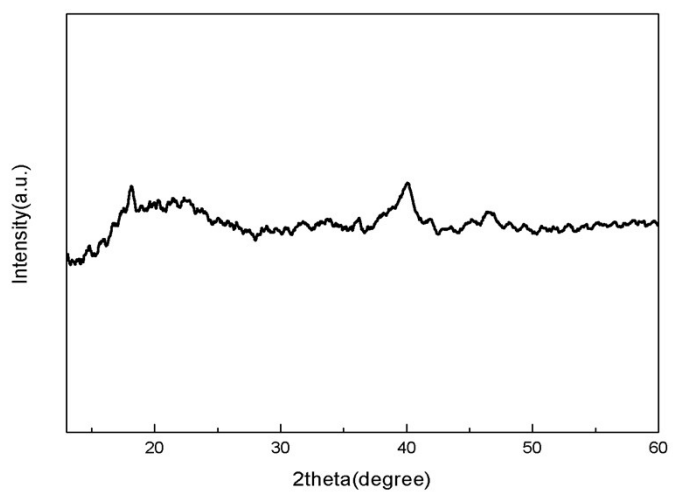

**Fig. S8** XRD patterns of Pd@CzMOP for Suzuki coupling reaction after five cycles.

**Table S1** Effect of the reaction condition on Suzuki coupling reaction using Pd@CzMOP<sup>a</sup>.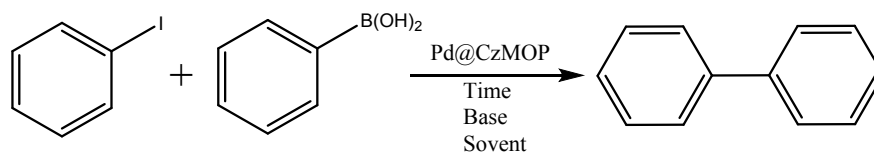

| Entry | Solvent | Time (h) | Base                            | Yield(%) <sup>b</sup> |
|-------|---------|----------|---------------------------------|-----------------------|
| 1     | DMF     | 6        | K <sub>2</sub> CO <sub>3</sub>  | 96                    |
| 2     | THF     | 6        | K <sub>2</sub> CO <sub>3</sub>  | 94                    |
| 3     | EtOH    | 6        | K <sub>2</sub> CO <sub>3</sub>  | 96                    |
| 4     | toluene | 6        | K <sub>2</sub> CO <sub>3</sub>  | 91                    |
| 5     | dioxane | 6        | K <sub>2</sub> CO <sub>3</sub>  | 88                    |
| 6     | DMF     | 6        | Na <sub>2</sub> CO <sub>3</sub> | 90                    |
| 7     | DMF     | 6        | KOH                             | 85                    |
| 8     | DMF     | 3        | K <sub>2</sub> CO <sub>3</sub>  | 85                    |
| 9     | DMF     | 1        | K <sub>2</sub> CO <sub>3</sub>  | 35                    |

<sup>a</sup> PhI (0.5 mmol), phenylboronic acid (0.75 mmol), K<sub>2</sub>CO<sub>3</sub> (1.5 equiv), Solvent (5 mL), and Pd@CzMOP (5 mg). <sup>b</sup> Isolated yield based on PhI.

**Table S2** Hot filtration test<sup>a</sup>

| Catalyst | Yield(%) <sup>b</sup> |         |
|----------|-----------------------|---------|
|          | 3 h                   | (3+3) h |
| Pd@CzMOP | 85                    | 85      |

<sup>a</sup> PhI (0.5 mmol), phenylboronic acid (0.75 mmol), K<sub>2</sub>CO<sub>3</sub> (1.5 equiv), Solvent (5 mL), and Pd@CzMOP (5 mg). <sup>b</sup> Isolated yield based on PhI.

### Spectral Data

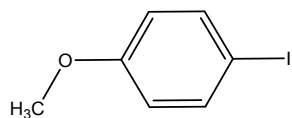

**1-iodo-4-methoxybenzene:** White solid (yield, 97 %).  $^1\text{H}$  NMR (400 MHz,  $\text{CDCl}_3$ ):  $\delta = 7.56$  (d,  $J = 4$  Hz, 2H),  $6.78$  (d,  $J = 8$  Hz, 2H),  $3.78$  (s, 3H) ppm.

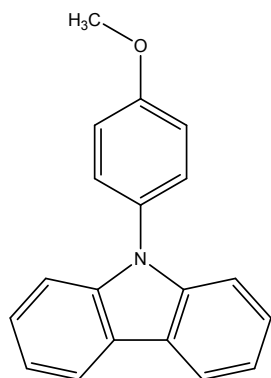

**9-(4-methoxyphenyl)-9H-carbazole:** White solid (yield, 90%).  $^1\text{H}$  NMR (400 MHz,  $\text{CDCl}_3$ ):  $\delta = 8.13$  (d,  $J = 8$  Hz, 2H),  $7.48$ – $7.28$  (m, 8H),  $7.12$  (d,  $J = 4$  Hz, 2H),  $3.92$  (s, 3H) ppm.

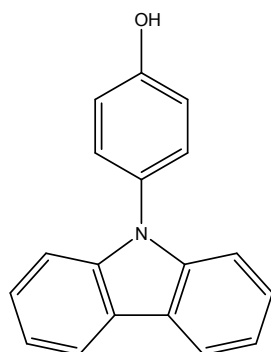

**4-(9H-carbazol-9-yl)phenol:** White solid (yield, 93%).  $^1\text{H}$  NMR (400 MHz,  $\text{CDCl}_3$ ):  $\delta = 8.14$  (d,  $J = 8$  Hz, 2H),  $7.42$ – $7.26$  (m, 8H),  $7.04$  (d,  $J = 8$  Hz, 2H),  $5.01$  (s, 1H) ppm.

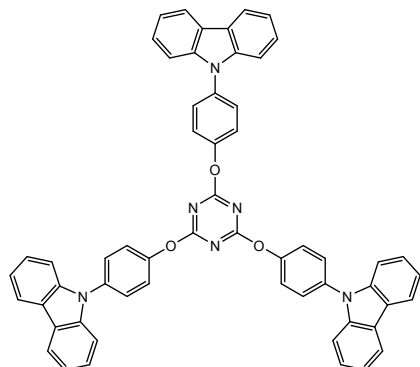

**2,4,6-tris(4-(9H-carbazol-9-yl)phenoxy)-1,3,5-triazine:** White solid (yield, 86%).  $^1\text{H}$  NMR (400 MHz,  $\text{CDCl}_3$ ):  $\delta = 8.10$  (d,  $J = 4$  Hz, 6H),  $7.63$  (d,  $J = 8$  Hz, 6H),  $7.49$



(d,  $J = 8$  Hz, 6H), 7.38 (d,  $J = 12$  Hz, 6H), 7.26–7.20 (m, 12H) ppm.

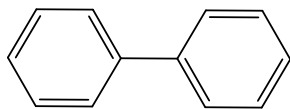

**1,1'-biphenyl:**  $^1\text{H}$  NMR (400 MHz,  $\text{CDCl}_3$ ):  $\delta = 7.63$  (d,  $J = 4$  Hz, 4H), 7.50–7.44 (t,  $J = 8$  Hz, 4H), 7.40–7.35 (t,  $J = 8$  Hz, 2H) ppm.

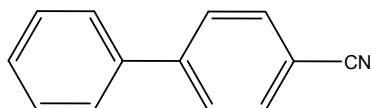

**[1,1'-biphenyl]-4-carbonitrile:**  $^1\text{H}$  NMR (400 MHz,  $\text{CDCl}_3$ ):  $\delta = 7.75$ –7.66 (m, 4H), 7.61–7.57 (m, 2H), 7.52–7.45 (m, 2H), 7.45–7.40 (m, 1H) ppm.

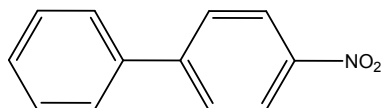

**4-nitro-1,1'-biphenyl:**  $^1\text{H}$  NMR (400 MHz,  $\text{CDCl}_3$ ):  $\delta = 8.32$ –8.28 (m, 2H), 7.76–7.72 (m, 2H), 7.65–7.61 (m, 2H), 7.53–7.42 (m, 3H) ppm.

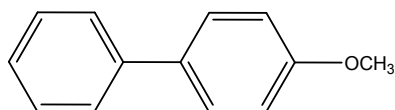

**4-methoxy-1,1'-biphenyl:**  $^1\text{H}$  NMR (400 MHz,  $\text{CDCl}_3$ ):  $\delta = 7.57$ –7.51 (m, 4H), 7.44–7.38 (t,  $J = 8$  Hz, 2H), 7.33–7.27 (t,  $J = 8$  Hz, 1H), 6.98 (d,  $J = 8$  Hz, 2H), 3.85 (s, 3H) ppm.

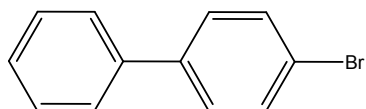

**4-bromo-1,1'-biphenyl:**  $^1\text{H}$  NMR (400 MHz,  $\text{CDCl}_3$ ):  $\delta = 7.58$ –7.53 (m, 4H), 7.48–7.41 (m, 4H), 7.39–7.33 (t,  $J = 8$  Hz, 1H) ppm.

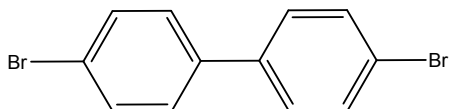

**4,4'-dibromo-1,1'-biphenyl:**  $^1\text{H}$  NMR (400 MHz,  $\text{CDCl}_3$ ):  $\delta = 7.59$ –7.53 (d,  $J = 8$  Hz, 4H), 7.44–7.38 (d,  $J = 8$  Hz, 4H) ppm.

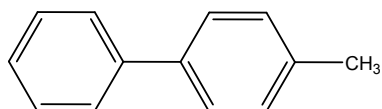

**4-methyl-1,1'-biphenyl:**  $^1\text{H}$  NMR (400 MHz,  $\text{CDCl}_3$ ):  $\delta = 7.60$ –7.55 (d,  $J = 8$  Hz, 2H), 7.52–7.46 (d,  $J = 8$  Hz, 2H), 7.45–7.39 (t,  $J = 8$  Hz, 2H), 7.35–7.29 (t,  $J = 8$  Hz, 1H),

7.27–7.23 (d,  $J = 8$  Hz, 2H), 2.40 (s, 3H) ppm.

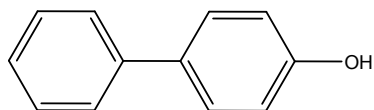

**[1,1'-biphenyl]-4-ol:**  $^1\text{H}$  NMR (400 MHz,  $\text{CDCl}_3$ ):  $\delta = 7.62\text{--}7.57$  (d,  $J = 4$  Hz, 2H), 7.54–7.49 (d,  $J = 8$  Hz, 2H), 7.47–7.41 (t,  $J = 8$  Hz, 2H), 7.38–7.31 (t,  $J = 8$  Hz, 1H), 6.65–6.59 (d,  $J = 8$  Hz, 2H), 4.82 (s, 1H) ppm.

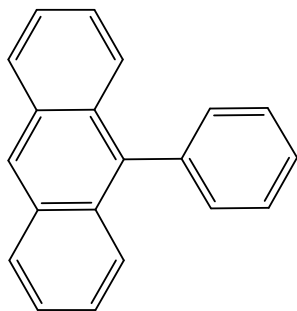

**9-phenylanthracene:**  $^1\text{H}$  NMR (400 MHz,  $\text{CDCl}_3$ ):  $\delta = 8.51$  (s, 1H), 8.05 (d,  $J = 8$  Hz, 2H), 7.69–7.65 (d,  $J = 8$  Hz, 2H), 7.61–7.53 (m, 3H), 7.49–7.42 (m, 4H), 7.38–7.32 (m, 2H) ppm.

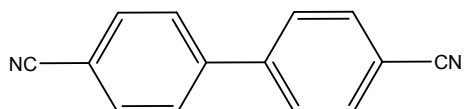

**[1,1'-biphenyl]-4,4'-dicarbonitrile:**  $^1\text{H}$  NMR (400 MHz,  $\text{CDCl}_3$ ):  $\delta = 7.85$  (d,  $J = 8$  Hz, 4H), 7.37 (d,  $J = 8$  Hz, 4H) ppm.

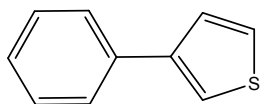

**3-phenylthiophene:**  $^1\text{H}$  NMR (400 MHz,  $\text{CDCl}_3$ ):  $\delta = 7.60$  (d,  $J = 8$  Hz, 2H), 7.47–7.36 (m, 5H), 7.32–7.26 (t,  $J = 8$  Hz, 1H) ppm.

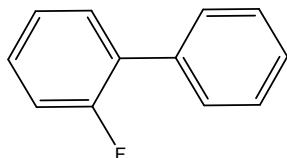

**2-fluoro-1,1'-biphenyl:**  $^1\text{H}$  NMR (400 MHz,  $\text{CDCl}_3$ ):  $\delta = 7.49\text{--}7.35$  (m, 7H), 7.35–7.31 (m, 1H), 7.31–7.26 (m, 1H) ppm.

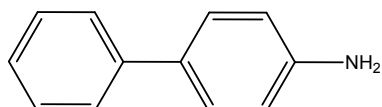

**[1,1'-biphenyl]-4-amine:**  $^1\text{H}$  NMR (400 MHz,  $\text{CDCl}_3$ ):  $\delta = 7.56\text{--}7.50$  (d,  $J = 8$  Hz, 2H), 7.44–7.35 (q, 4H), 7.29–7.22 (d,  $J = 16$  Hz, 1H), 6.78–6.72 (d,  $J = 8$  Hz, 2H), 3.72 (s,

2H) ppm.

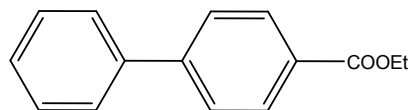

**ethyl [1,1'-biphenyl]-4-carboxylate:**  $^1\text{H NMR}$  (400 MHz,  $\text{CDCl}_3$ ):  $\delta = 8.13\text{--}8.09$  (d,  $J = 8$  Hz, 2H),  $7.68\text{--}7.60$  (q, 4H),  $7.50\text{--}7.43$  (t,  $J = 8$  Hz, 2H),  $7.42\text{--}7.36$  (t,  $J = 8$  Hz, 1H),  $4.44\text{--}4.36$  (q, 2H),  $1.44\text{--}1.39$  (t,  $J = 8$  Hz, 3H) ppm.

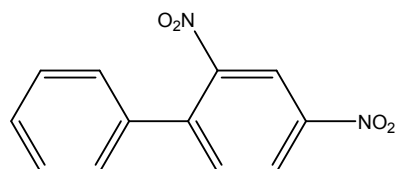

**2,4-dinitro-1,1'-biphenyl:**  $^1\text{H NMR}$  (400 MHz,  $\text{CDCl}_3$ ):  $\delta = 8.69$  (d,  $J = 2.7$  Hz, 1H),  $8.26\text{--}8.21$  (m, 2H),  $8.19$  (d,  $J = 2.7$  Hz, 1H),  $7.64\text{--}7.55$  (m, 1H),  $7.54\text{--}7.46$  (m, 2H),  $7.00$  (d,  $J = 9.5$  Hz, 1H).

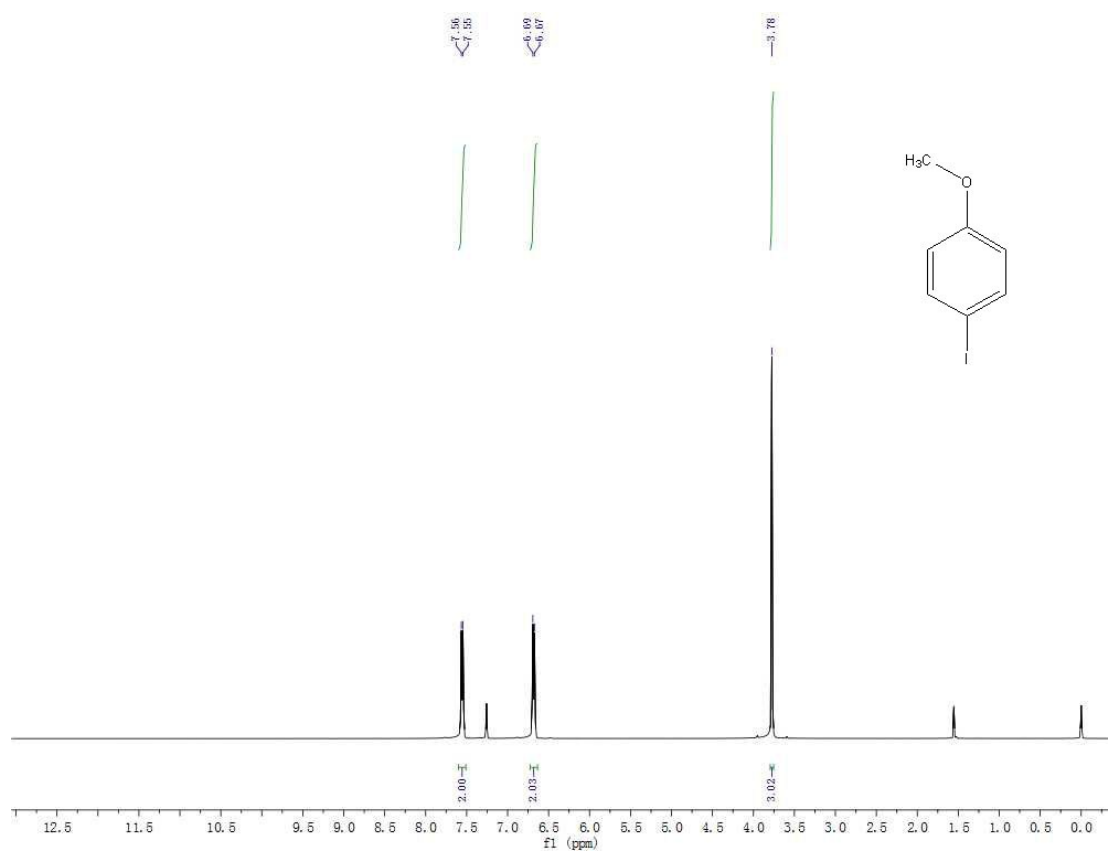

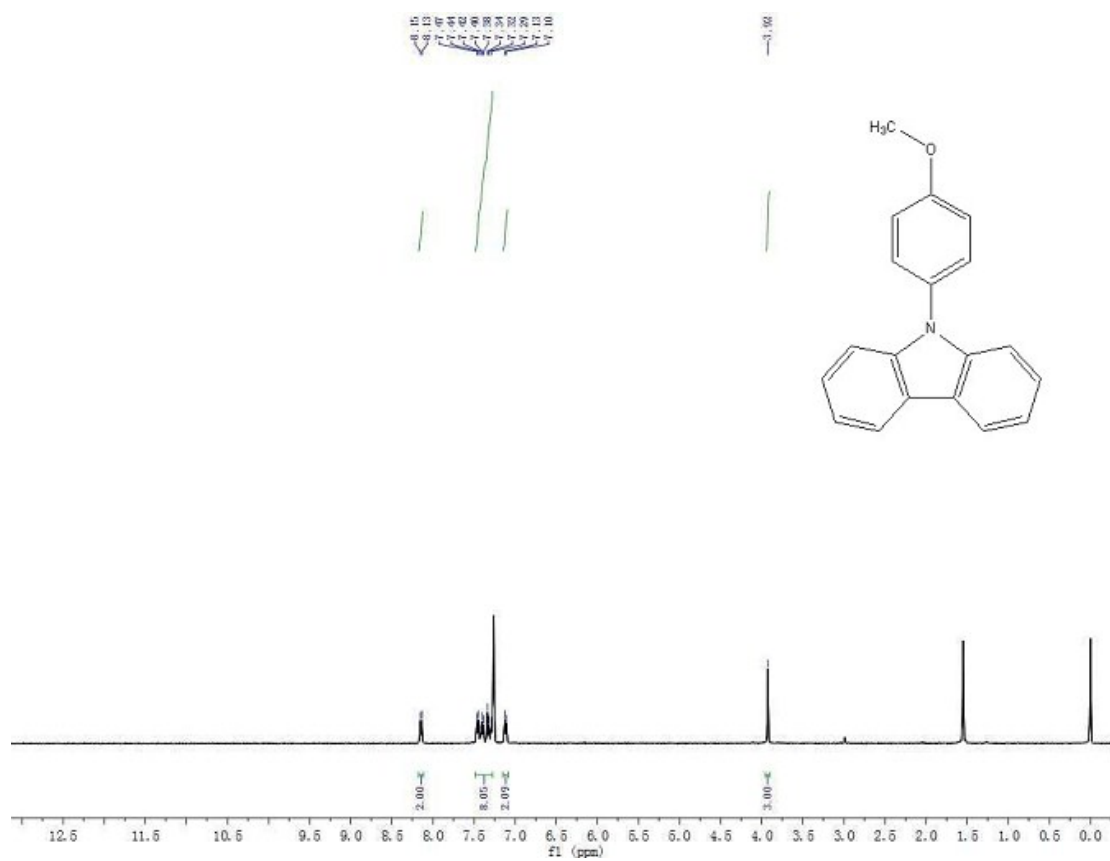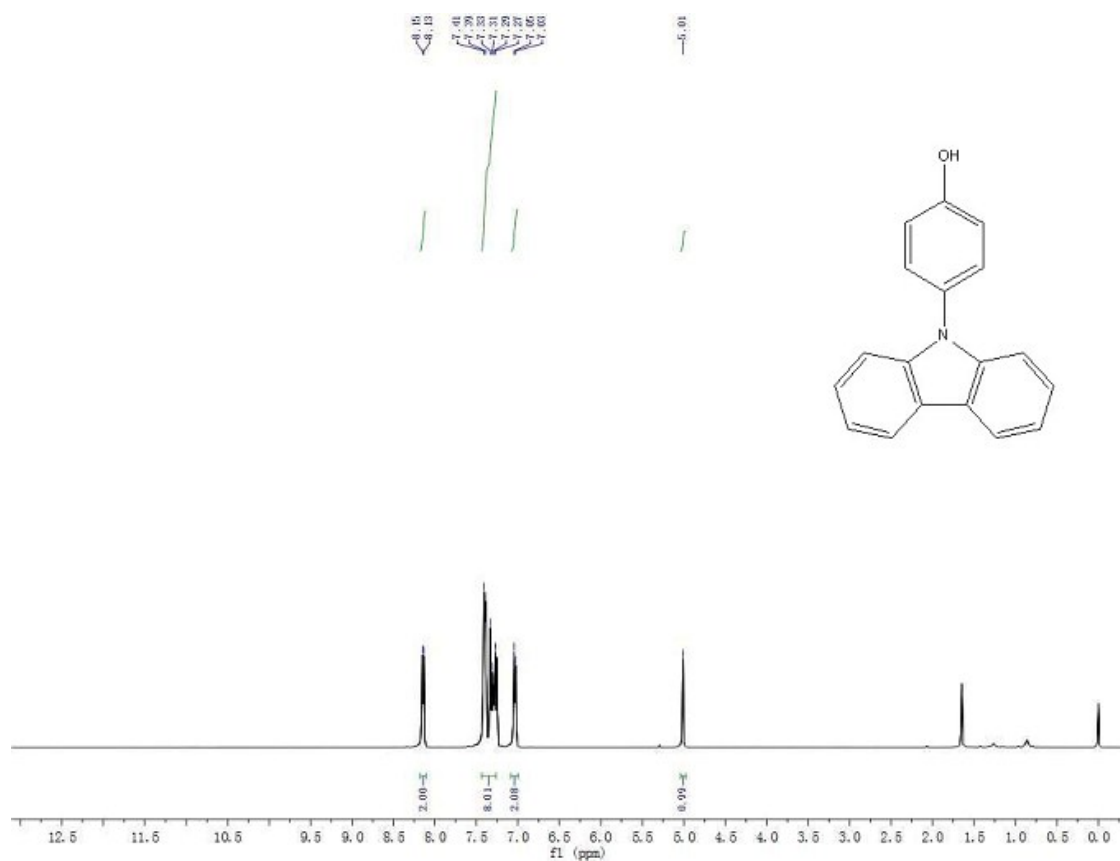



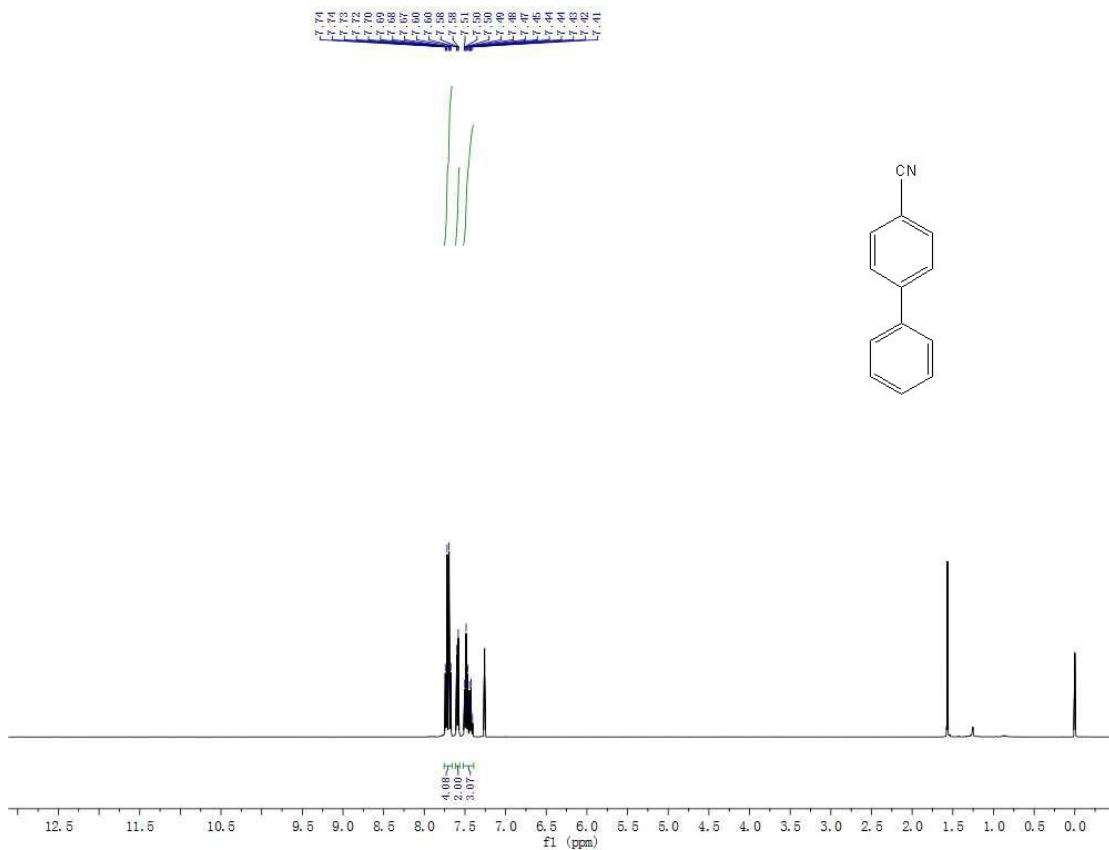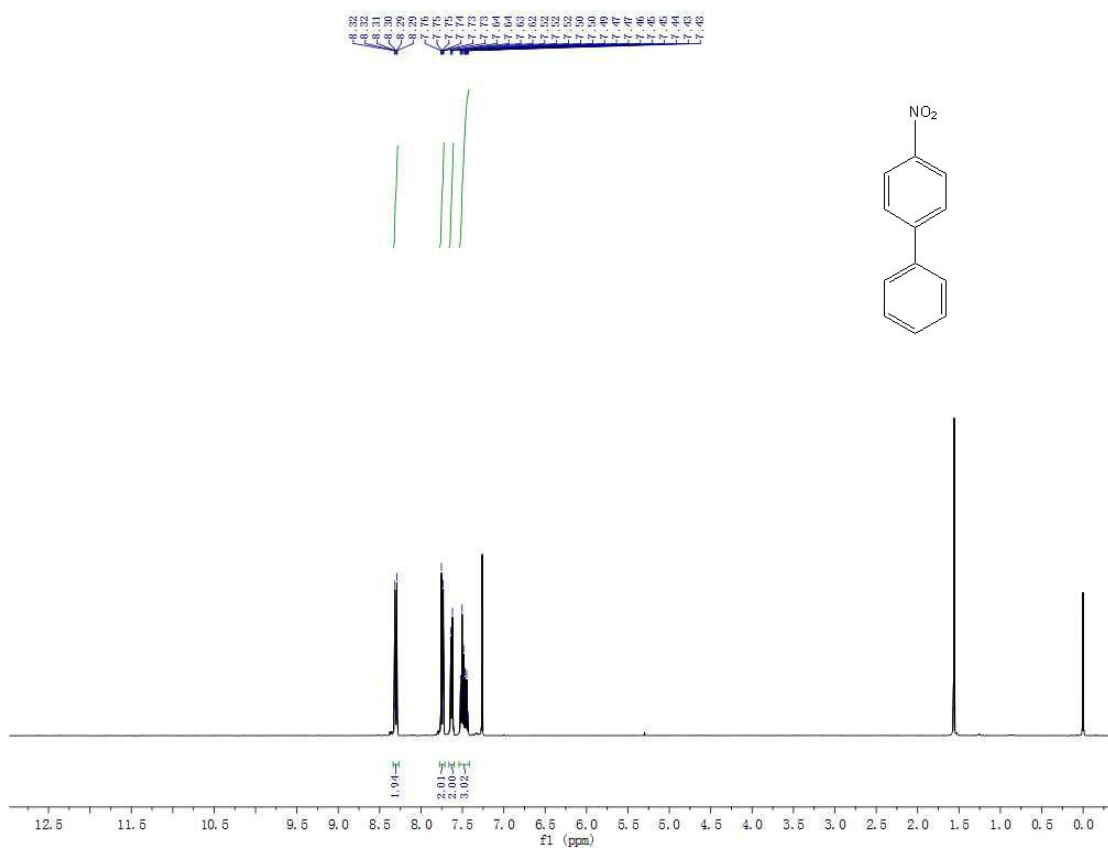

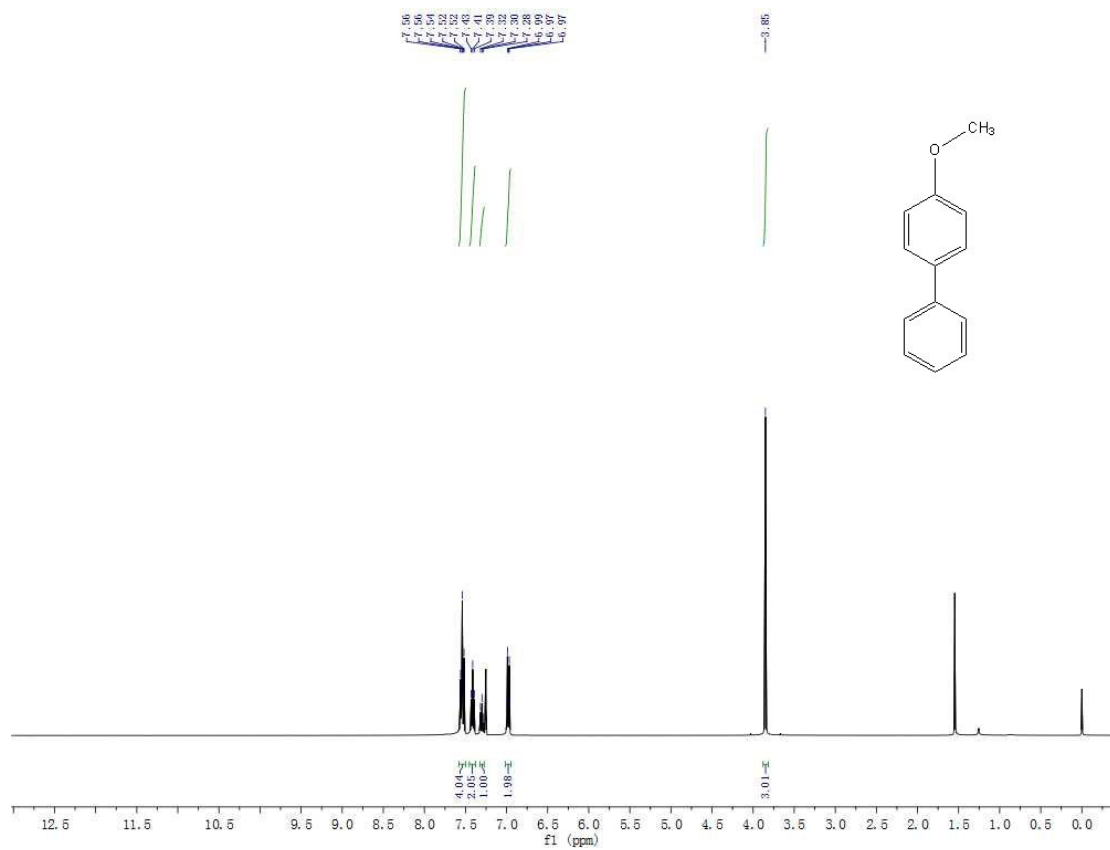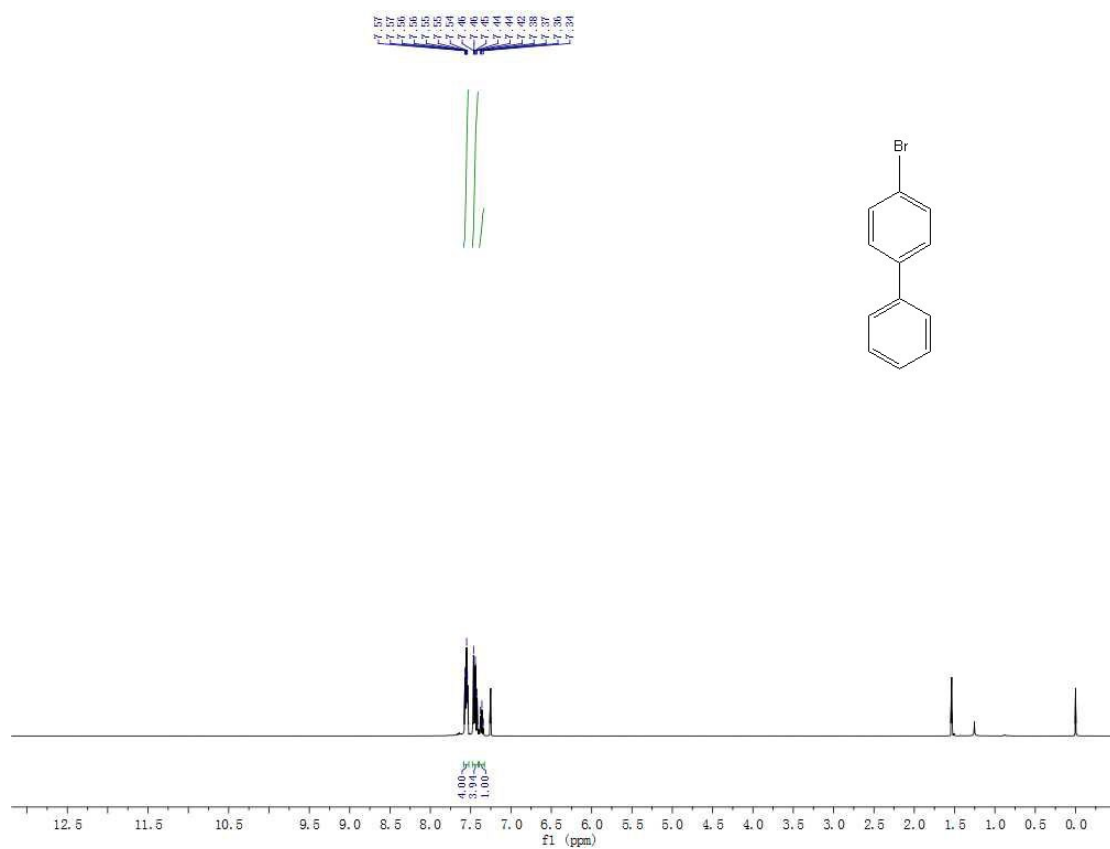

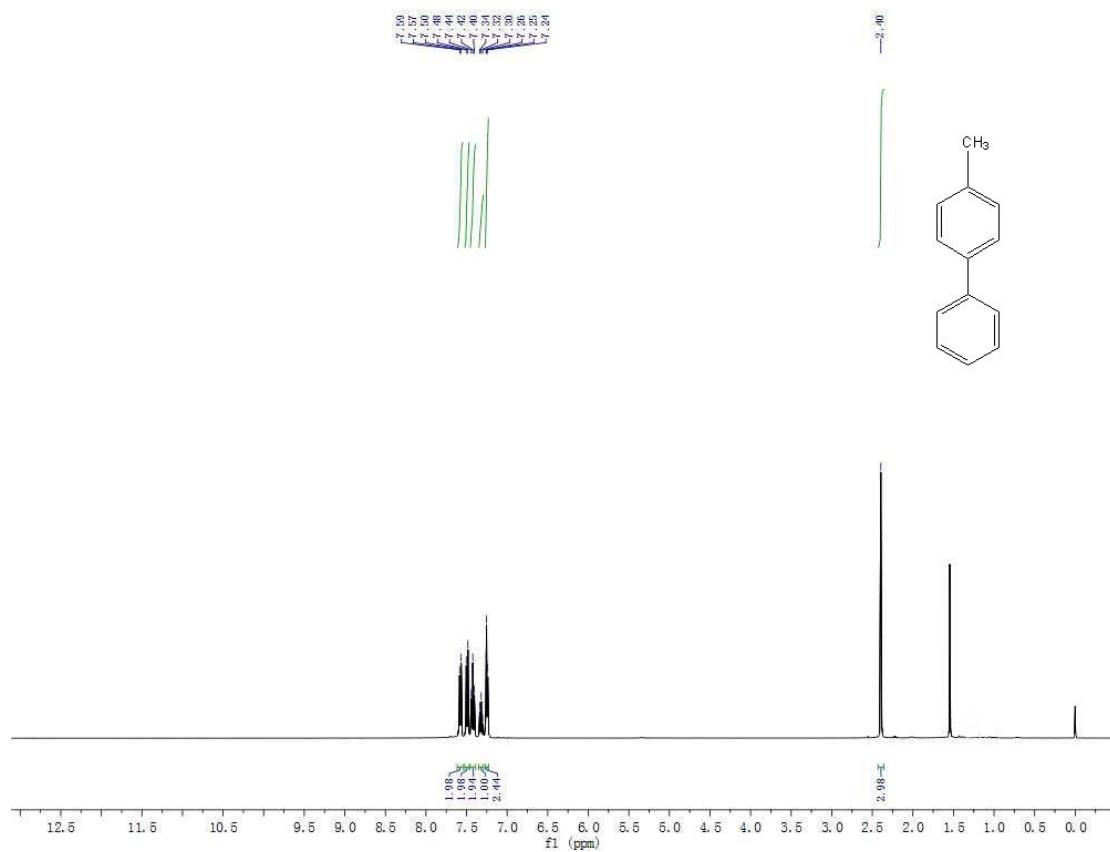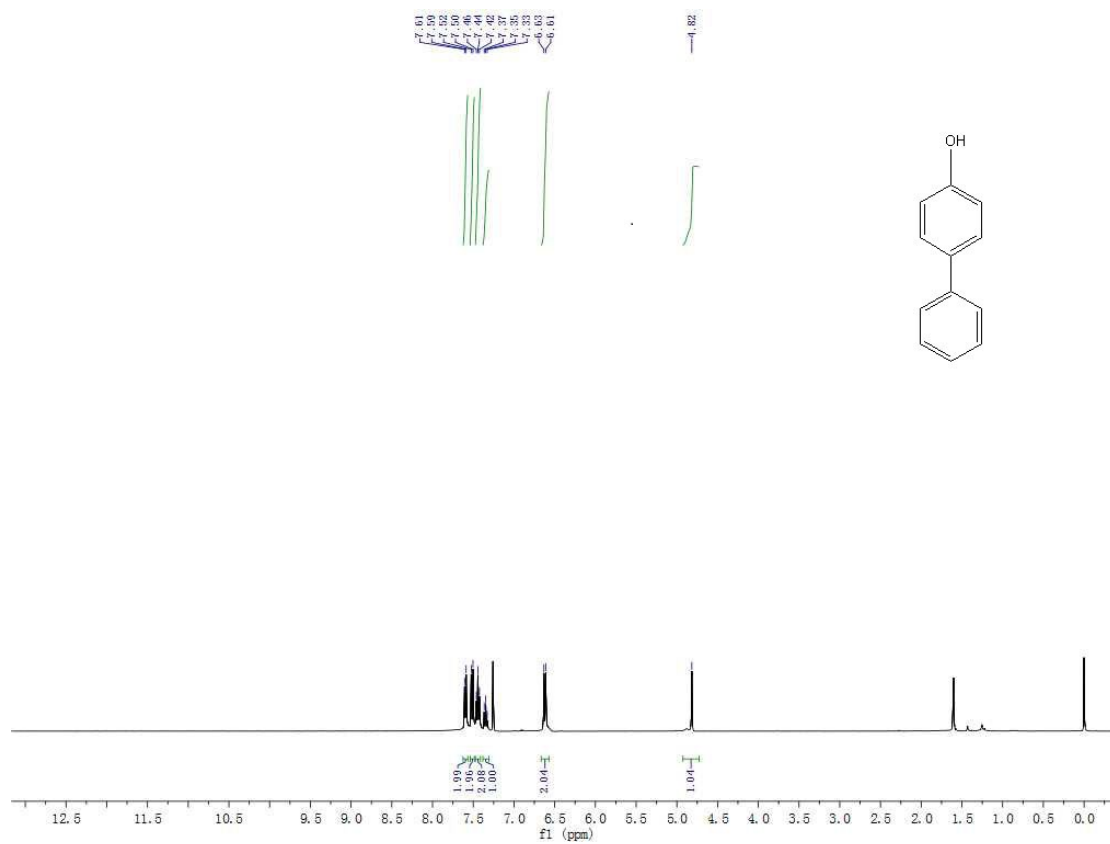



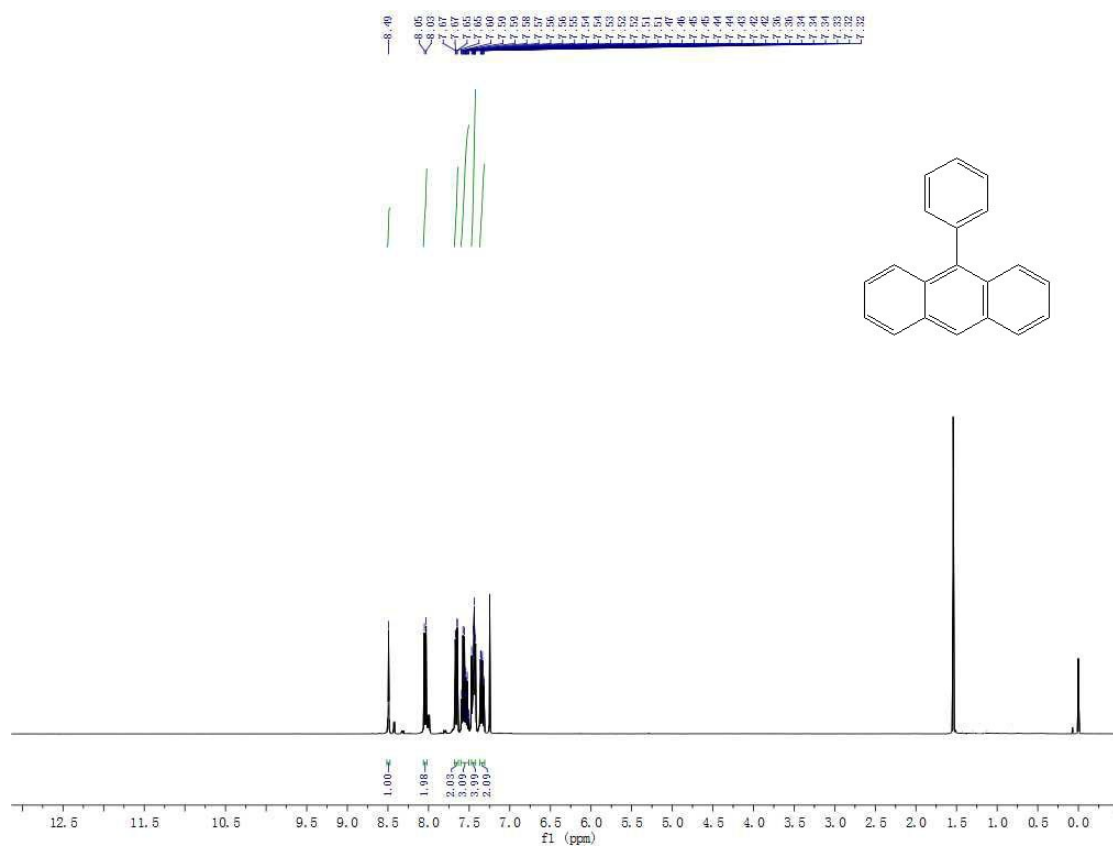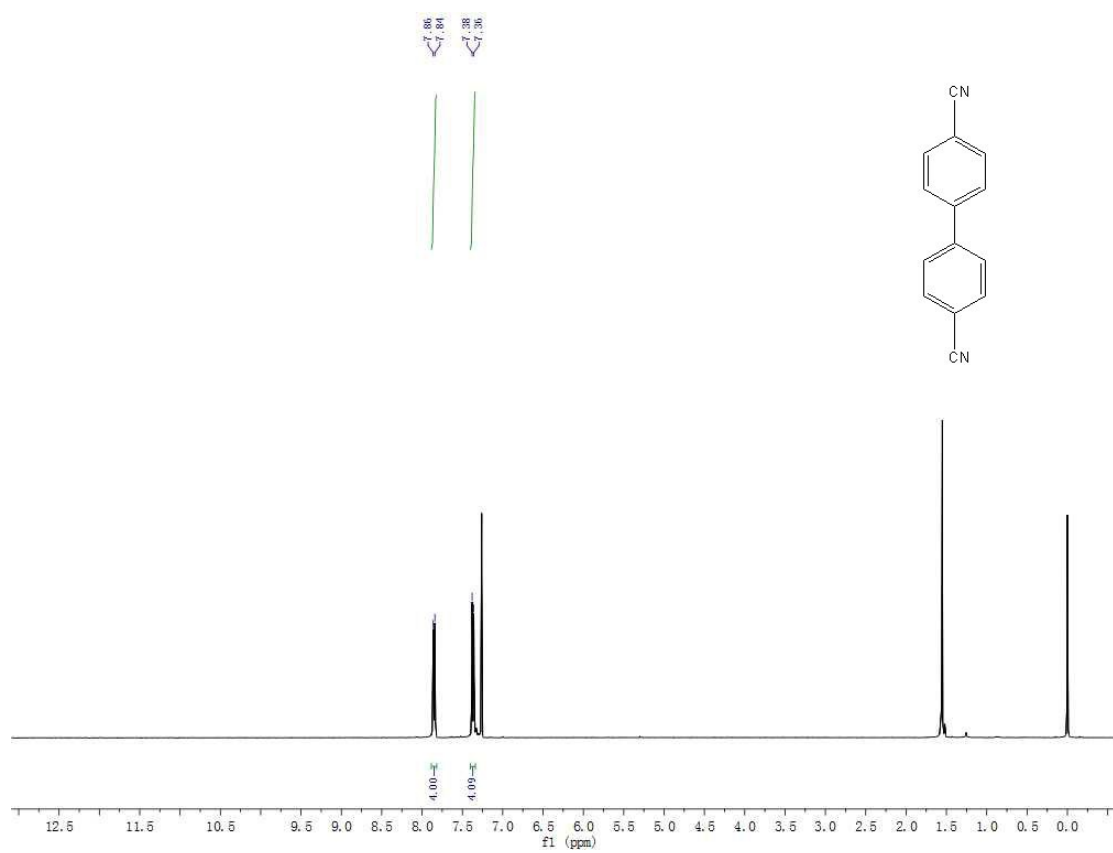

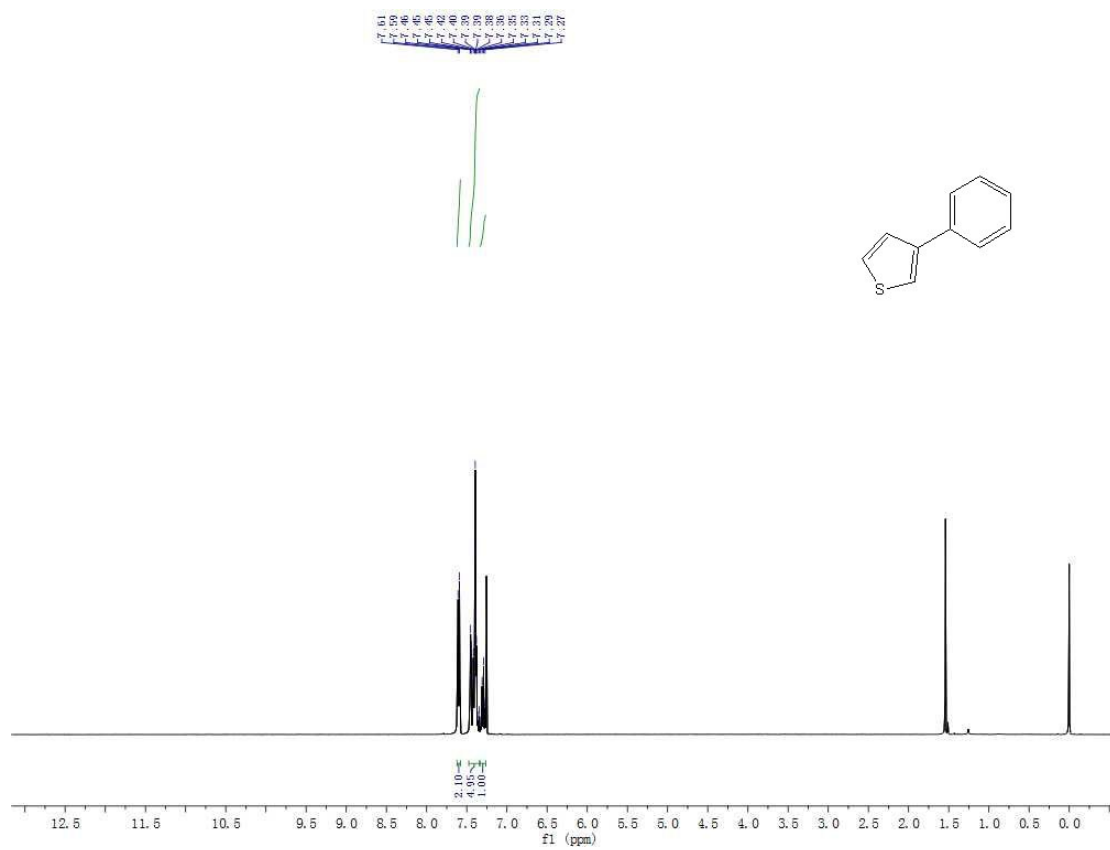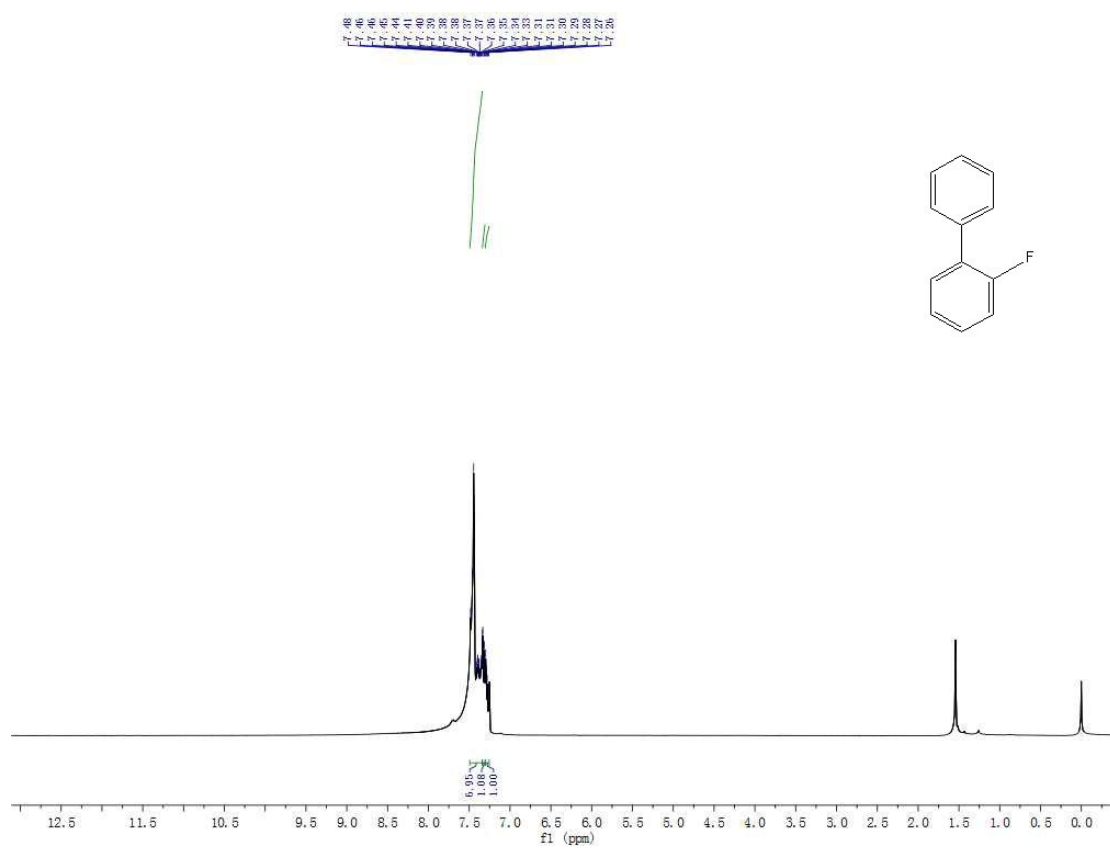

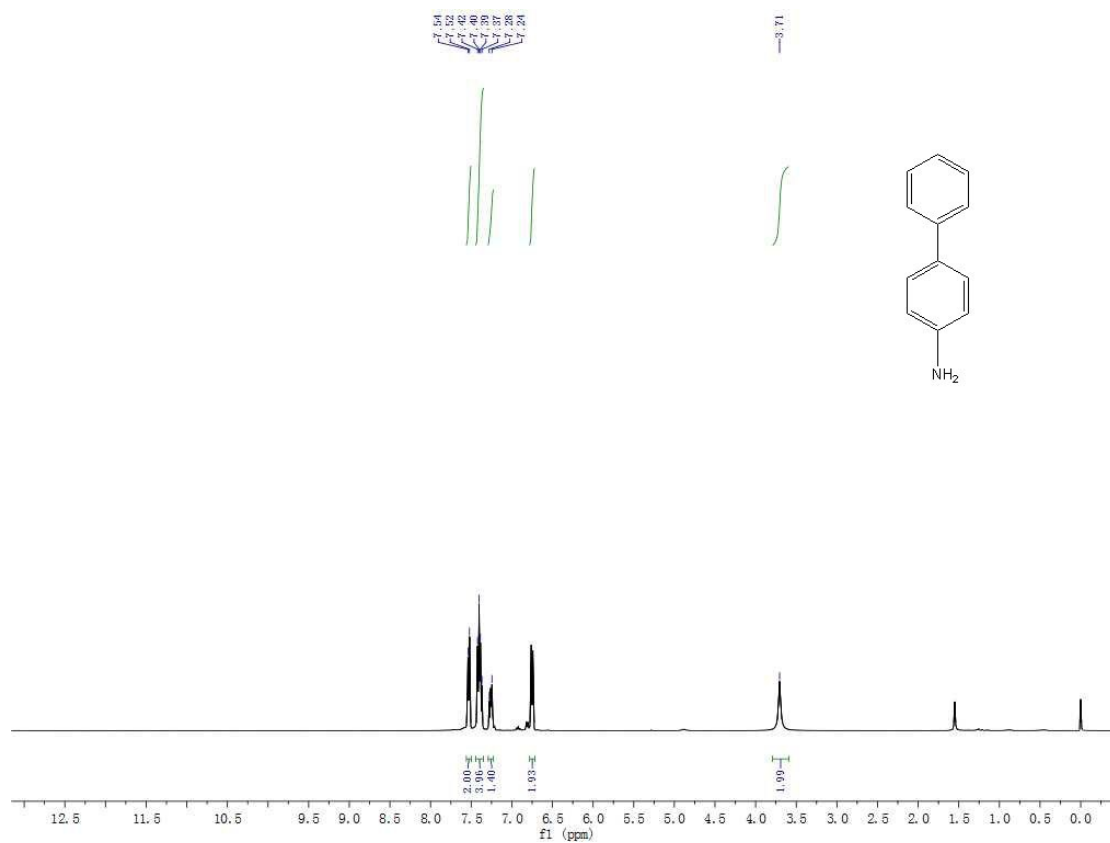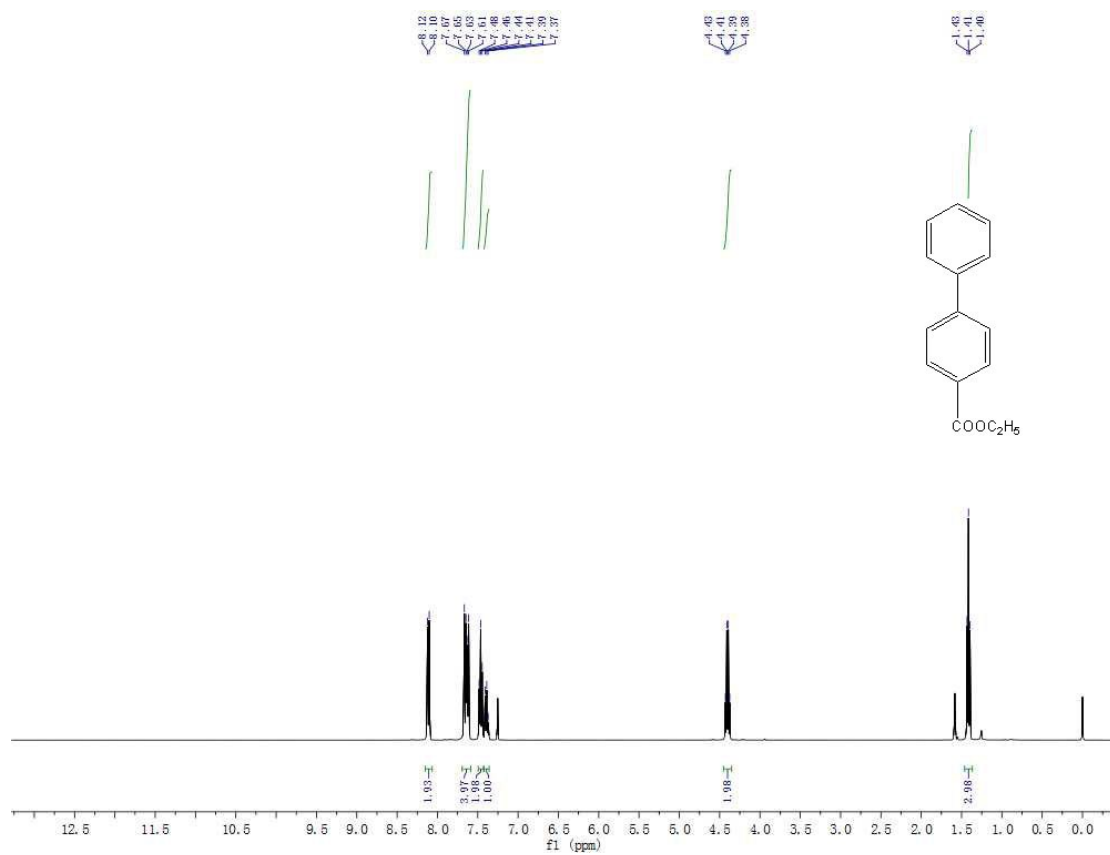

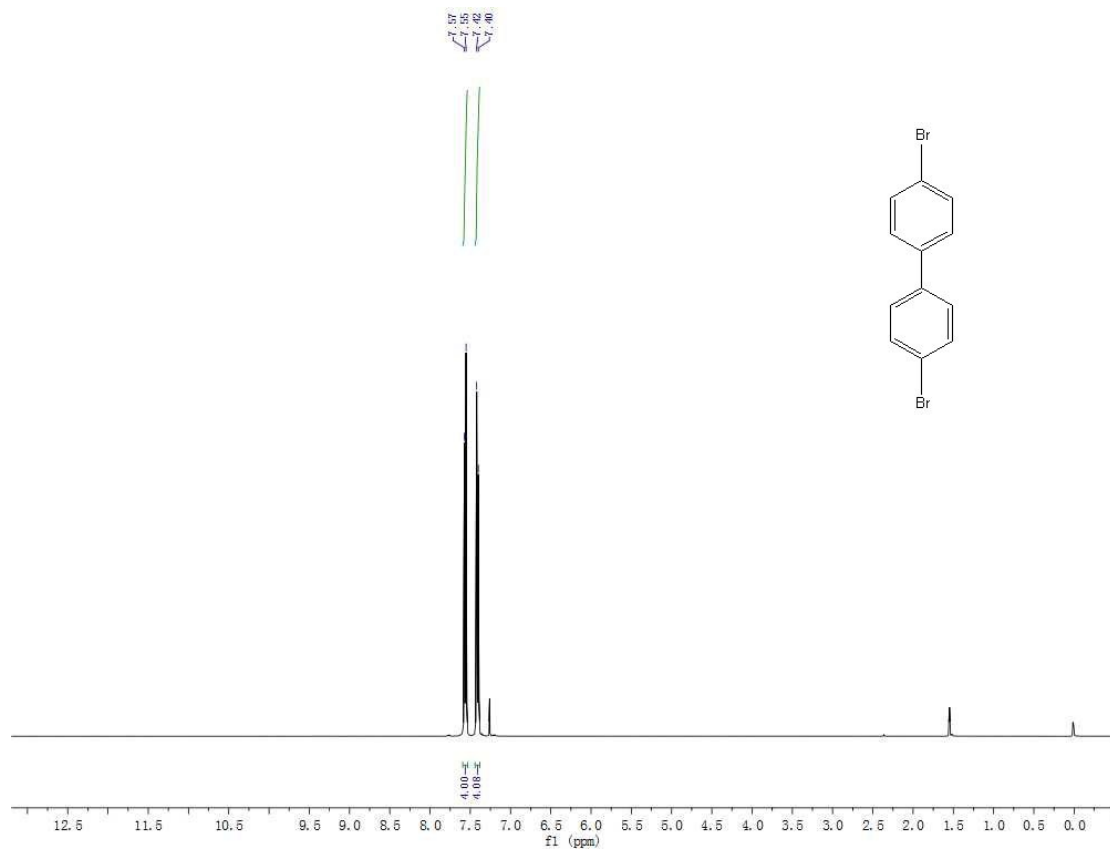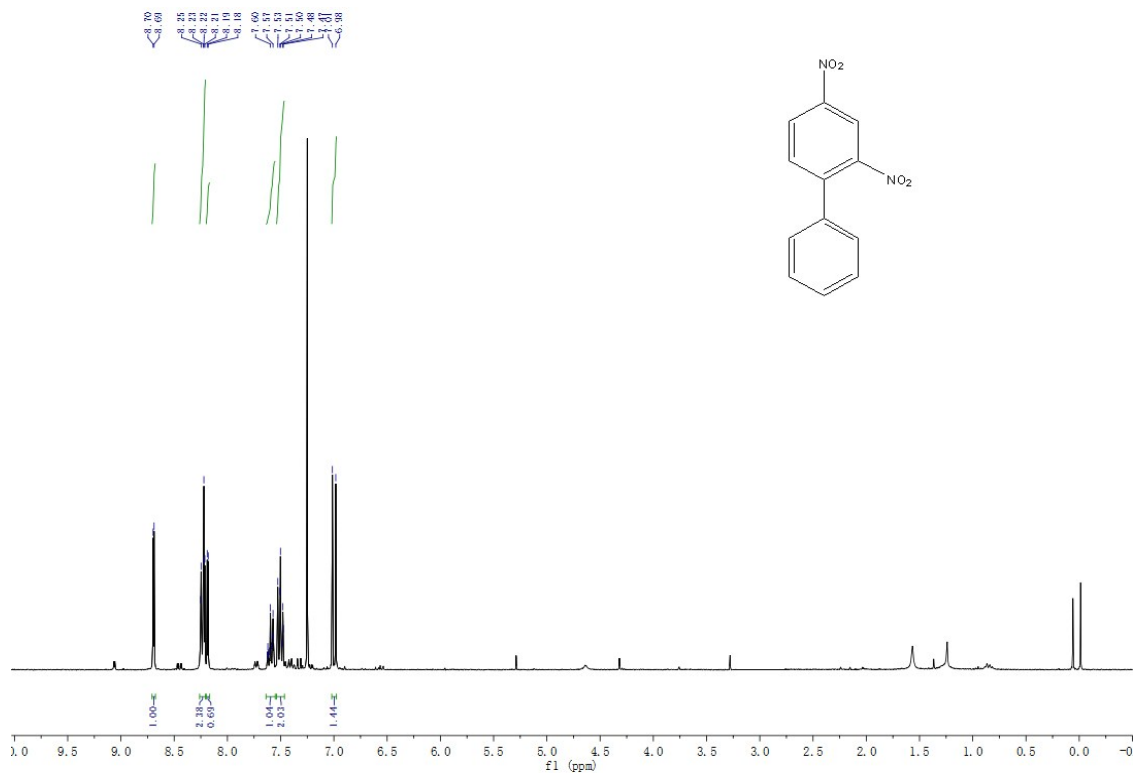

Supplement: c6py01784c1.pdf [file c6py01784c1.pdf]
